# Supplementary material for: Palmitic Acid Induces MicroRNA-221 Expression to Decrease Glucose Uptake in HepG2 Cells via the PI3K/AKT/GLUT4 Pathway
Source: Hindawi journal article supplement (doi:10.1155/2019/8171989), 2019-11-11
Supplement: f1 [file 8171989.f1.pdf]

Position 522-529 of PIK3R1 3' UTR 5' ...UAACAAAUGAACGAU**AUGUAGCA**  
[hsa-miR-221-3p](#) 3' ... CUUUGGGUCGUCUGU**UACAUCGA**

Psicheck2-PIK3R1:   TAACAAATGAACGAT**ATGTAGCA** 

Psicheck2-PIK3R1-m:   TAACAAATGAACGAT**TTCGAGTA** 

 Luciferase coding sequence

 PIK3R1-3'UTR

**Supplemental Figure 1. A schematic diagram showing the construction of the luciferase reporter vectors**
